# Supplementary material
Source: publisher site journal article supplement (https://www.dovepress.com/article/228704)
Supplement: Supplementary file 1 [file get_supplementary_file.php]

**Supplementary Table S1 Comparison of plasmids sequences using BLASTN**

| <b>(coverage+identity)</b> | <b>pKPN-c22</b> | <b>pKPSH11</b> | <b>p6234-198.371kb</b> | <b>pKPN3-307_TypeC</b> | <b>pKPN3-307_typeA</b> | <b>pA1705-qnrS</b> | <b>p911021-tetA</b> | <b>p1642-tetA</b> |
|----------------------------|-----------------|----------------|------------------------|------------------------|------------------------|--------------------|---------------------|-------------------|
| <b>pKPN-c22</b>            |                 | (99%+99%)      | (99%+100%)             | (82%+99%)              | (81%+99%)              | (70%+99%)          | (70%+97%)           | (70%+99%)         |
| <b>pKPSH11</b>             | (92%+99%)       |                | (99%+99%)              | (77%+99%)              | (82%+99%)              | (71%+96%)          | (68%+96%)           | (68%+96%)         |
| <b>p6234-198.371kb</b>     | (92%+100%)      | (99%+99%)      |                        | (77%+99%)              | (82%+98%)              | (72%+99%)          | (67%+99%)           | (67%+99%)         |
| <b>pKPN3-307_TypeC</b>     | (68%+99%)       | (69%+99%)      | (69%+99%)              |                        | (97%+99%)              | (79%+99%)          | (70%+99%)           | (70%+98%)         |
| <b>pKPN3-307_typeA</b>     | (64%+99%)       | (70%+99%)      | (71%+99%)              | (93%+99%)              |                        | (80%+97%)          | (68%+97%)           | (68%+97%)         |
| <b>pA1705-qnrS</b>         | (47%+99%)       | (52%+96%)      | (53%+99%)              | (65%+99%)              | (68%+97%)              |                    | (88%+99%)           | (87%+99%)         |
| <b>p911021-tetA</b>        | (51%+99%)       | (54%+96%)      | (55%+99%)              | (63%+99%)              | (64%+97%)              | (97%+99%)          |                     | (99%+99%)         |
| <b>p1642-tetA</b>          | (51%+99%)       | (55%+96%)      | (55%+99%)              | (63%+98%)              | (64%+97%)              | (97%+99%)          | (99%+99%)           |                   |

**Supplementary table S2 Pairwise comparison of plasmids backbone sequences using BLASTN**

| <b>(coverage+identity)</b> | <b>pKPN-c22</b> | <b>pKPSH11</b> | <b>p6234-198.371kb</b> | <b>pKPN3-307_TypeC</b> | <b>pKPN3-307_typeA</b> | <b>pA1705-qnrS</b> | <b>p911021-tetA</b> | <b>p1642-tetA</b> |
|----------------------------|-----------------|----------------|------------------------|------------------------|------------------------|--------------------|---------------------|-------------------|
| <b>pKPN-c22</b>            |                 | (99%+99%)      | (99%+99%)              | (80%+99%)              | (81%+99%)              | (78%+97%)          | (78%+97%)           | (78%+97%)         |
| <b>pKPSH11</b>             | (98%+99%)       |                | (98%+99%)              | (79%+99%)              | (80%+98%)              | (77%+97%)          | (77%+97%)           | (77%+96%)         |
| <b>p6234-198.371kb</b>     | (99%+99%)       | (99%+99%)      |                        | (80%+99%)              | (81%+98%)              | (78%+97%)          | (78%+97%)           | (78%+96%)         |
| <b>pKPN3-307_TypeC</b>     | (98%+99%)       | (98%+99%)      | (98%+99%)              |                        | (98%+99%)              | (94%+99%)          | (94%+99%)           | (94%+99%)         |
| <b>pKPN3-307_typeA</b>     | (98%+99%)       | (98%+98%)      | (98%+98%)              | (97%+99%)              |                        | (95%+98%)          | (95%+98%)           | (95%+97%)         |
| <b>pA1705-qnrS</b>         | (96%+97%)       | (96%+97%)      | (96%+97%)              | (95%+99%)              | (97%+98%)              |                    | (100%+99%)          | (100%+99%)        |
| <b>p911021-tetA</b>        | (96%+97%)       | (96%+97%)      | (96%+97%)              | (95%+99%)              | (97%+98%)              | (100%+99%)         |                     | (100%+99%)        |
| <b>p1642-tetA</b>          | (96%+97%)       | (96%+96%)      | (96%+96%)              | (95%+99%)              | (97%+97%)              | (100%+99%)         | (100%+99%)          |                   |

**Supplementary Table S3 Accessory modules of the MDR region from pKPN-c22, pKPSH11, p6234-198.371kb, pKPN3-307\_TypeC, and pKPN13-307\_typeA and the MDR-1 region from pA1705-qnrS**

| pKPN-c22<br>MDR region                               | pKPSH11<br>MDR region                                                  | p6234-198.371kb<br>MDR region                                          | pKPN3-307_TypeC<br>MDR region                        | pKPN3-307_typeA<br>MDR region                                          | pA1705-qnrS<br>First MDR region                             |
|------------------------------------------------------|------------------------------------------------------------------------|------------------------------------------------------------------------|------------------------------------------------------|------------------------------------------------------------------------|-------------------------------------------------------------|
| IS26                                                 | $\Delta$ IS26- $\Delta$ IS26                                           | ISKpn28                                                                | Tn3 Family transposon remnant                        | Tn3 Family transposon remnant                                          | Truncated<br>IS26-sul2-strA-strB-IS26<br>Transposition unit |
| In37 residual                                        | $\Delta$ IS5075                                                        | IS26                                                                   | IS26                                                 | IS26                                                                   | Tn2                                                         |
| IS26                                                 | IS26-sul2-strA-strB-IS26<br>Transposition unit residual                | $\Delta$ ISPa38                                                        | In37 residual                                        | $\Delta$ ISPa38                                                        | IS26-sul2-strA-strB-IS26<br>Transposition unit residual     |
| Tn1721 residual                                      | Tn2-3'                                                                 | IS5075                                                                 | $\Delta$ IS26                                        | IS5075                                                                 | IS5075                                                      |
| Tn5403                                               | ISEcp1-bla <sub>CTX-M-15</sub> - $\Delta$ orf477<br>Transposition unit | IS26-sul2-strA-strB-IS26<br>Transposition unit residual                | Tn1721 residual                                      | IS26-sul2-strA-strB-IS26<br>Transposon remnant                         | $\Delta$ IS26                                               |
| Truncated<br>IS3000-qnrB1-IS26<br>Transposition unit | Tn2-5'                                                                 | Tn2-3'                                                                 | $\Delta$ Tn5403                                      | $\Delta$ Tn2                                                           | IS26-tetA(D)-tetR(D)-IS26<br>Transposition unit derivative  |
| In191                                                | IS26 residual                                                          | ISEcp1-bla <sub>CTX-M-15</sub> - $\Delta$ orf477<br>Transposition unit | Truncated<br>IS3000-qnrB1-IS26<br>Transposition unit | ISEcp1-bla <sub>CTX-M-15</sub> - $\Delta$ orf477<br>Transposition unit | IS26                                                        |
| ecoRII-ecoRIImet                                     | IS26-cld-IS26<br>Transposition unit residual                           | Tn2-5'                                                                 | In191                                                | Tn2 residual                                                           | orf447                                                      |
| IS1X2 residual                                       | Tn6415 residual                                                        | $\Delta$ IS26                                                          | ecoRII-ecoRIImet                                     | Tn6415                                                                 | $\Delta$ ISKpn38                                            |

|                                                          |                                                                  |                                                               |                |                                                                   |   |
|----------------------------------------------------------|------------------------------------------------------------------|---------------------------------------------------------------|----------------|-------------------------------------------------------------------|---|
| $\Delta$ IS26                                            | $\Delta$ IS26                                                    | Truncated<br>IS26- <i>cl</i> -IS26<br>Transposition unit      | IS1X2 residual | In37 residual                                                     | - |
| $\Delta$ Tn2                                             | In37 residual                                                    | $\Delta$ Tn2                                                  | IS26           | IS26                                                              | - |
| Truncated<br>IS26- <i>cl</i> -IS26<br>Transposition unit | $\Delta$ IS26                                                    | $\Delta$ Tn6415                                               | -              | Tn1721 residual                                                   | - |
| $\Delta$ IS26-IS26                                       | Tn1721 residual                                                  | In37 residual                                                 | -              | Tn5403                                                            | - |
| -                                                        | Tn5403                                                           | IS26                                                          | -              | Truncated<br>IS3000- <i>qnrB1</i> -<br>IS26<br>Transposition unit | - |
| -                                                        | IS3000- <i>qnrB1</i> -<br>IS26<br>Transposition unit<br>residual | Tn1721 residual                                               | -              | In191                                                             | - |
| -                                                        | $\Delta$ IS26                                                    | Tn5403-3'                                                     | -              | <i>ecoRII-ecoRIImet</i>                                           | - |
| -                                                        | In191                                                            | IS26                                                          | -              | IS1X2 residual                                                    | - |
| -                                                        | <i>ecoRII-ecoRIImet</i>                                          | Tn5403-5'                                                     | -              | IS26                                                              | - |
| -                                                        | IS1X2 residual                                                   | Truncated IS3000-<br><i>qnrB1</i> -IS26<br>Transposition unit | -              | -                                                                 | - |
| -                                                        | $\Delta$ IS26- $\Delta$ IS26-<br>$\Delta$ IS26                   | In191                                                         | -              | -                                                                 | - |
| -                                                        |                                                                  | <i>ecoRII-ecoRIImet</i>                                       | -              | -                                                                 | - |
| -                                                        | -                                                                | IS26                                                          | -              | -                                                                 | - |

**Supplementary Table S4 Accessory modules of the MDR region from p1642-tetA and p911021-tetA, and the MDR-2 region from pA1705-qnrS**

| <b>p1642-tetA</b>                      | <b>p911021-tetA</b>                    | <b>pA1705-qnrS</b>                     |
|----------------------------------------|----------------------------------------|----------------------------------------|
| $\Delta$ Tn1721                        | ISEcp1-bla <sub>CTX-M-14</sub> -IS903D | $\Delta$ Tn1721                        |
| In363                                  | orf273                                 | In363                                  |
| IS26-mph(A)-mrx-mphR(A)-IS6100         | orf219                                 | IS26-mph(A)-mrx-mphR(A)-IS6100         |
| IS26-bla <sub>SHV-12</sub> -IS26       | IS26                                   | orf267                                 |
| Tn1721                                 | orf762                                 | orf537                                 |
| orf627                                 | IS26-bla <sub>SHV-12</sub> -IS26       | IS26                                   |
| IS26-bla <sub>LAP-2</sub> -qnrS-IS26   | IS26                                   | Tn1721                                 |
| aacC2-tmrB                             | $\Delta$ ISVsa5                        | orf627                                 |
| $\Delta$ ISVsa5                        | aacC2-tmrB                             | IS26-bla <sub>LAP-2</sub> -qnrS-IS26   |
| IS26                                   | IS26-bla <sub>LAP-2</sub> -qnrS-IS26   | aacC2-tmrB                             |
| IS26-bla <sub>SHV-12</sub> -IS26       | orf627                                 | $\Delta$ ISVsa5                        |
| orf219                                 | Tn1721                                 | IS26                                   |
| orf273                                 | Tn4352                                 | IS26-bla <sub>SHV-12</sub> -IS26       |
| ISEcp1-bla <sub>CTX-M-14</sub> -IS903D | IS26-mph(A)-mrx-mphR(A)-IS6100         | orf762                                 |
| -                                      | In363                                  | IS26                                   |
| -                                      | $\Delta$ Tn1721                        | orf219                                 |
| -                                      | -                                      | orf273                                 |
| -                                      | -                                      | ISEcp1-bla <sub>CTX-M-14</sub> -IS903D |
